# Supplementary material for: COVID-19 health and social care access for autistic people: European policy review
Source: PubMed Central journal article supplement — BMJ Open. 2021 May 17;11(6):e045341. doi: 10.1136/bmjopen-2020-045341 (PMC8130751; doi:10.1136/bmjopen-2020-045341), 2021-05-17
Supplement: bmjopen-2020-045341supp001.pdf [file bmjopen-2020-045341supp001.pdf]

**Supplementary Table 1***Autism-Europe survey demographics, collected between April 7<sup>th</sup> and May 31<sup>st</sup> 2020.*

|                |             | N respondent autistic person |                 |                 |               | N respondent caregiver |                 |                 |               | Gender<br>M:F:NB <sup>a</sup> |
|----------------|-------------|------------------------------|-----------------|-----------------|---------------|------------------------|-----------------|-----------------|---------------|-------------------------------|
|                |             | Age range 0-18               | Age range 19-40 | Age range 41-64 | Age range 65+ | Age range 0-18         | Age range 18-40 | Age range 41-65 | Age range 65+ |                               |
| Region         | Austria     | 0                            | 4               | 1               | 0             | 5                      | 1               | 1               | 0             | 7:4:0                         |
|                | Belgium     | 1                            | 9               | 9               | 0             | 3                      | 4               | 8               | 0             | 11:21:0                       |
|                | France      | 0                            | 21              | 9               | 1             | 13                     | 12              | 26              | 4             | 30:52:1                       |
|                | Germany     | 1                            | 25              | 12              | 1             | 3                      | 8               | 9               | 1             | 12:45:1                       |
|                | Greece      | 1                            | 4               | 1               | 0             | 6                      | 46              | 107             | 0             | 24:127:0                      |
|                | Ireland     | 0                            | 2               | 1               | 0             | 1                      | 0               | 1               | 0             | 2:3:0                         |
|                | Italy       | 4                            | 4               | 6               | 0             | 12                     | 30              | 122             | 14            | 64:122:1                      |
|                | Luxembourg  | 0                            | 11              | 3               | 0             | 3                      | 1               | 12              | 3             | 14:17:0                       |
|                | Malta       | 0                            | 1               | 0               | 0             | 11                     | 23              | 16              | 1             | 8:33:0                        |
|                | Netherlands | 7                            | 45              | 46              | 1             | 4                      | 10              | 30              | 0             | 34:103:2                      |
|                | Poland      | 0                            | 1               | 0               | 0             | 0                      | 1               | 0               | 1             | 0:3:0                         |
|                | Portugal    | 0                            | 0               | 0               | 0             | 0                      | 0               | 0               | 1             | 0:1:0                         |
|                | Spain       | 1                            | 10              | 2               | 0             | 27                     | 61              | 192             | 11            | 94:200:1                      |
|                | Switzerland | 3                            | 34              | 19              | 1             | 16                     | 17              | 53              | 1             | 47:95:1                       |
| United Kingdom | 2           | 18                           | 23              | 1               | 1             | 6                      | 13              | 2               | 16:42:4       |                               |

Note: Age ranges and gender refer to the autistic person reporting, or being reported on by a caregiver. <sup>a</sup>M=Male; F=Female; NB=Non-binary/ third gender.

**Supplementary Material 1**

Common review templates for COVID-19 health and social care policies/ guidelines, distributed to the: a) AIMS-2-TRIALS early career autism researchers and panel of representatives from the autism community and; b) AIMS-2-TRIALS Clinical Trials Network.

a)

| Enter: Country/ Region                                           |                                                                                                     |                                                                                                                                                                                                                   |                                                                                                                                            |                                                                                           |                                                                                                                                                                                                     |
|------------------------------------------------------------------|-----------------------------------------------------------------------------------------------------|-------------------------------------------------------------------------------------------------------------------------------------------------------------------------------------------------------------------|--------------------------------------------------------------------------------------------------------------------------------------------|-------------------------------------------------------------------------------------------|-----------------------------------------------------------------------------------------------------------------------------------------------------------------------------------------------------|
| Source                                                           | Summary of evidence                                                                                 |                                                                                                                                                                                                                   |                                                                                                                                            |                                                                                           |                                                                                                                                                                                                     |
| Full source reference (include date and weblink, where relevant) | Access to COVID-19 screening/ testing                                                               | Hospitalisation/ intensive care                                                                                                                                                                                   | Social care/ self-isolation                                                                                                                | Changes to usual healthcare practice                                                      | Other comments/ issues<br>OR<br>Review                                                                                                                                                              |
| Include publication date and, where relevant, the full weblink.  | Consider: test availability; test procedure (e.g. sensory); getting test results; any other issues. | Consider: availability of hospital/ intensive care beds; triage/ resource allocation; inclusion/ exclusion criteria; provision and quality of care; resuscitation orders; discharge procedures; any other issues. | Consider: provision of social/ residential/ community care; support for individuals who are self-isolating or shielding; any other issues. | Consider: access to/ delivery of standard services (e.g. mental health, remote delivery). | Any other comments, notes, guidelines, policies.<br>OR<br>Professional commentary on changes to regional services/ official guidance on service access (for AIMS-2-TRIALS Clinical Trials Network). |

**Supplementary Table 2.**

List of published policies/ guidelines included in this study, with source of access documented.

| Publication                                                                              | Date       | Language            | Source of access                                                                                                                                                                                                                                                                                                                                                                                                                                |
|------------------------------------------------------------------------------------------|------------|---------------------|-------------------------------------------------------------------------------------------------------------------------------------------------------------------------------------------------------------------------------------------------------------------------------------------------------------------------------------------------------------------------------------------------------------------------------------------------|
| <b>Belgium</b>                                                                           |            |                     |                                                                                                                                                                                                                                                                                                                                                                                                                                                 |
| National Public Health Institute (Sciensano)                                             | 20/05/2020 | Dutch               | <a href="https://covid-19.sciensano.be/sites/default/files/Covid19/COVID-19_procedure_hospitals_NL.pdf">https://covid-19.sciensano.be/sites/default/files/Covid19/COVID-19_procedure_hospitals_NL.pdf</a>                                                                                                                                                                                                                                       |
| Ethics committee for care in UZ Leuven                                                   | 17/03/2020 | Dutch               | <a href="https://cdn.digisecure.be/grip/2020331121514529_leidraad-voor-ethisch-handelen-uz-leuven.pdf">https://cdn.digisecure.be/grip/2020331121514529_leidraad-voor-ethisch-handelen-uz-leuven.pdf</a>                                                                                                                                                                                                                                         |
| Belgian Society of Intensive Care Medicine                                               | 18/03/2020 | English             | <a href="https://www.hartcentrumhasselt.be/professioneel/nieuws-professioneel/ethical-principles-concerning-proportionality-of-critical-care-during-the-covid-19-pandemic-advice-by-the-belgian-society-of-ic-medicine%20">https://www.hartcentrumhasselt.be/professioneel/nieuws-professioneel/ethical-principles-concerning-proportionality-of-critical-care-during-the-covid-19-pandemic-advice-by-the-belgian-society-of-ic-medicine%20</a> |
| Federal Public Service Social Security                                                   | 29/05/2020 | Dutch               | <a href="https://www.socialsecurity.be/citizen/nl/static/infos/coronavirus/index.htm#">https://www.socialsecurity.be/citizen/nl/static/infos/coronavirus/index.htm#</a> <a href="https://www.socialsecurity.be/citizen/nl/static/infos/coronavirus/index.htm#">https://www.socialsecurity.be/citizen/nl/static/infos/coronavirus/index.htm#</a>                                                                                                 |
| Agency for Care and Health                                                               | 18/03/2020 | Dutch               | <a href="https://www.zorg-en-gezondheid.be/sites/default/files/atoms/files/maatregelen%20COVID_19_GGZ_200318.pdf">https://www.zorg-en-gezondheid.be/sites/default/files/atoms/files/maatregelen%20COVID_19_GGZ_200318.pdf</a>                                                                                                                                                                                                                   |
| FPS Public Health, Food Chain Safety and Environment of Belgium                          | 01/04/2020 | Dutch               | <a href="https://overlegorganen.gezondheid.belgie.be/sites/default/files/documents/20200401-bureaufrggzb-nota_nl_covid-19.pdf">https://overlegorganen.gezondheid.belgie.be/sites/default/files/documents/20200401-bureaufrggzb-nota_nl_covid-19.pdf</a>                                                                                                                                                                                         |
| Department of Welfare, Public Health and Family                                          | 13/04/2020 | Dutch               | <a href="https://www.departementwvg.be/sites/default/files/media/20200414_Taskforce_wob.pdf">https://www.departementwvg.be/sites/default/files/media/20200414_Taskforce_wob.pdf</a>                                                                                                                                                                                                                                                             |
| Belgium Society of Emergency and Disaster Medicine and the Belgian Resuscitation Council | 22/03/2020 | English             | <a href="https://www.ordeartsenbrabant.org/assets/images/BESEDIM_26mars2020_Ethical-decision-making-in-emergencies_COVID19_22032020_final.pdf">https://www.ordeartsenbrabant.org/assets/images/BESEDIM_26mars2020_Ethical-decision-making-in-emergencies_COVID19_22032020_final.pdf</a>                                                                                                                                                         |
| Flemish Agency for Persons with a Disability                                             | 21/04/2020 | Dutch               | <a href="https://www.vaph.be/sites/default/files/documents/15117/infonota_20_102_compenserende_maatregelen_nav_covid-19_7_.pdf">https://www.vaph.be/sites/default/files/documents/15117/infonota_20_102_compenserende_maatregelen_nav_covid-19_7_.pdf</a>                                                                                                                                                                                       |
| Flemish Agency for Persons with a Disability                                             | 15/04/2020 | Dutch               | <a href="https://www.vaph.be/nieuws/de-impact-van-de-coronacrisis-op-personen-met-een-verstandelijke-handicap-enof">https://www.vaph.be/nieuws/de-impact-van-de-coronacrisis-op-personen-met-een-verstandelijke-handicap-enof</a>                                                                                                                                                                                                               |
| National Employment Office                                                               | 01/07/2020 | Dutch/German/French | <a href="https://www.rva.be/nl/documentatie/infoblad/t9-0#h2_0">https://www.rva.be/nl/documentatie/infoblad/t9-0#h2_0</a>                                                                                                                                                                                                                                                                                                                       |
| Agency for Care and Health                                                               | 17/03/2020 | Dutch               | <a href="https://www.zorg-en-gezondheid.be/sites/default/files/atoms/files/Maatregelen_corona_RCA_17_03_20.pdf">https://www.zorg-en-gezondheid.be/sites/default/files/atoms/files/Maatregelen_corona_RCA_17_03_20.pdf</a>                                                                                                                                                                                                                       |
| Fédération Wallonie-Bruxelles                                                            | 17/03/2020 | French              | <a href="http://www.enseignement.be/index.php?page=28294">http://www.enseignement.be/index.php?page=28294</a>                                                                                                                                                                                                                                                                                                                                   |
| National Institute for Health and Disability Insurance                                   | N/A        | Dutch               | <a href="https://www.riziv.fgov.be/nl/covid19/Paginas/default.aspx">https://www.riziv.fgov.be/nl/covid19/Paginas/default.aspx</a>                                                                                                                                                                                                                                                                                                               |

|                                                                           |            |         |                                                                                                                                                                                                                                                                                                                                                                                                                                                                                                                                                                                                                                                                          |
|---------------------------------------------------------------------------|------------|---------|--------------------------------------------------------------------------------------------------------------------------------------------------------------------------------------------------------------------------------------------------------------------------------------------------------------------------------------------------------------------------------------------------------------------------------------------------------------------------------------------------------------------------------------------------------------------------------------------------------------------------------------------------------------------------|
| <b>The Netherlands</b>                                                    |            |         |                                                                                                                                                                                                                                                                                                                                                                                                                                                                                                                                                                                                                                                                          |
| Ministry of Health, Wellbeing and Sports                                  | 23/03/2020 | Dutch   | <a href="https://www.rijksoverheid.nl/onderwerpen/coronavirus-covid-19/zorg/geestelijke-gezondheidszorg-ggz">https://www.rijksoverheid.nl/onderwerpen/coronavirus-covid-19/zorg/geestelijke-gezondheidszorg-ggz</a><br><a href="https://www.rijksoverheid.nl/onderwerpen/coronavirus-covid-19/nieuws/2020/03/23/nieuwe-bezoekersregeling-gehandicaptenzorg-en-ggz">https://www.rijksoverheid.nl/onderwerpen/coronavirus-covid-19/nieuws/2020/03/23/nieuwe-bezoekersregeling-gehandicaptenzorg-en-ggz</a>                                                                                                                                                                 |
| National Institute for Public Health and the Environment                  | 17/08/2020 | Dutch   | <a href="https://lci.rivm.nl/covid-19/PBMbuitenziekenhuis">https://lci.rivm.nl/covid-19/PBMbuitenziekenhuis</a>                                                                                                                                                                                                                                                                                                                                                                                                                                                                                                                                                          |
| Dutch Youth Institute                                                     | 19/08/2020 | Dutch   | <a href="https://www.nji.nl/coronavirus/Professionals/Fysiek-contact-bij-ambulante-hulpverlening-bij-het-coronavirus">https://www.nji.nl/coronavirus/Professionals/Fysiek-contact-bij-ambulante-hulpverlening-bij-het-coronavirus</a>                                                                                                                                                                                                                                                                                                                                                                                                                                    |
| Federation of Medical Specialists                                         |            | Dutch   | <a href="https://www.demedischspecialist.nl/sites/default/files/Leidraad%20triage%20thuisbehandeling%20versus%20verwijzen%20oudere%20pati%C3%ABnt%20met%20verdenking%20COVID-19.pdf">https://www.demedischspecialist.nl/sites/default/files/Leidraad%20triage%20thuisbehandeling%20versus%20verwijzen%20oudere%20pati%C3%ABnt%20met%20verdenking%20COVID-19.pdf</a>                                                                                                                                                                                                                                                                                                      |
| Association of Mental Health Physicians                                   | 14/04/2020 | Dutch   | <a href="https://nvavg.nl/wp-content/uploads/2020/04/NVAVG_Covid-19_leidraad.pdf">https://nvavg.nl/wp-content/uploads/2020/04/NVAVG_Covid-19_leidraad.pdf</a>                                                                                                                                                                                                                                                                                                                                                                                                                                                                                                            |
| Royal Dutch Medical Association                                           | 16/06/2020 | Dutch   | <a href="https://www.rijksoverheid.nl/documenten/publicaties/2020/06/16/draaiboek-triage-op-basis-van-niet-medische-overwegingen-voor-ic-opname-ten-tijde-van-fase-3-in-de-covid-19-pandemie">https://www.rijksoverheid.nl/documenten/publicaties/2020/06/16/draaiboek-triage-op-basis-van-niet-medische-overwegingen-voor-ic-opname-ten-tijde-van-fase-3-in-de-covid-19-pandemie</a>                                                                                                                                                                                                                                                                                    |
| <b>United Kingdom</b>                                                     |            |         |                                                                                                                                                                                                                                                                                                                                                                                                                                                                                                                                                                                                                                                                          |
| UK Department of Health and Social Care                                   | 12/08/2020 | English | <a href="https://www.gov.uk/guidance/coronavirus-covid-19-getting-tested">https://www.gov.uk/guidance/coronavirus-covid-19-getting-tested</a>                                                                                                                                                                                                                                                                                                                                                                                                                                                                                                                            |
| NHS England                                                               |            | English | <a href="https://www.england.nhs.uk/coronavirus/wp-content/uploads/sites/52/2020/04/C0290_Supporting-patients-who-are-unwell-with-COVID-19-in-MHLDA-settings.pdf">https://www.england.nhs.uk/coronavirus/wp-content/uploads/sites/52/2020/04/C0290_Supporting-patients-who-are-unwell-with-COVID-19-in-MHLDA-settings.pdf</a>                                                                                                                                                                                                                                                                                                                                            |
| NHS Providers                                                             | 03/06/2020 | English | <a href="https://nhsproviders.org/media/689590/spotlight-on-mental-health.pdf">https://nhsproviders.org/media/689590/spotlight-on-mental-health.pdf</a>                                                                                                                                                                                                                                                                                                                                                                                                                                                                                                                  |
| Health Protection Surveillance Centre                                     | 28/07/2020 | English | <a href="https://www.hpsc.ie/a-z/respiratory/coronavirus/novelcoronavirus/guidance/outbreakmanagementguidance/RCF_guidance_document.pdf">https://www.hpsc.ie/a-z/respiratory/coronavirus/novelcoronavirus/guidance/outbreakmanagementguidance/RCF_guidance_document.pdf</a>                                                                                                                                                                                                                                                                                                                                                                                              |
| Social Care Institute for Excellence                                      | 29/06/2020 | English | <a href="https://www.scie.org.uk/care-providers/coronavirus-covid-19/commissioning/impact-on-citizens">https://www.scie.org.uk/care-providers/coronavirus-covid-19/commissioning/impact-on-citizens</a>                                                                                                                                                                                                                                                                                                                                                                                                                                                                  |
| National Institute of Health and Care Excellence                          | 20/03/2020 | English | <a href="https://www.nice.org.uk/guidance/ng159/resources/covid19-rapid-guideline-critical-care-in-adults-pdf-66141848681413">https://www.nice.org.uk/guidance/ng159/resources/covid19-rapid-guideline-critical-care-in-adults-pdf-66141848681413</a>                                                                                                                                                                                                                                                                                                                                                                                                                    |
| UK Department of Health and Social Care                                   | 31/07/2020 | English | <a href="https://www.gov.uk/government/publications/visiting-care-homes-during-coronavirus/update-on-policies-for-visiting-arrangements-in-care-homes">https://www.gov.uk/government/publications/visiting-care-homes-during-coronavirus/update-on-policies-for-visiting-arrangements-in-care-homes</a><br><a href="https://www.gov.uk/government/publications/coronavirus-covid-19-changes-to-the-care-act-2014/care-act-easements-guidance-for-local-authorities#purpose-of-the-easements">https://www.gov.uk/government/publications/coronavirus-covid-19-changes-to-the-care-act-2014/care-act-easements-guidance-for-local-authorities#purpose-of-the-easements</a> |
| Care Quality Commission                                                   | 03/07/2020 | English | <a href="https://www.cqc.org.uk/guidance-providers/adult-social-care/care-act-easements-it">https://www.cqc.org.uk/guidance-providers/adult-social-care/care-act-easements-it</a>                                                                                                                                                                                                                                                                                                                                                                                                                                                                                        |
| <b>Italy</b>                                                              |            |         |                                                                                                                                                                                                                                                                                                                                                                                                                                                                                                                                                                                                                                                                          |
| Osservatorio Nazionale Autismo ISS, Istituto Superiore di Sanità          | 30/03/2020 | Italian | <a href="https://www.iss.it/documents/20126/0/Rapporto+ISS+COVID-19+n.+8+autismo+%282%29.pdf/c558b34e-1bc9-c868-0c75-0030f8299bca?t=1585757457709">https://www.iss.it/documents/20126/0/Rapporto+ISS+COVID-19+n.+8+autismo+%282%29.pdf/c558b34e-1bc9-c868-0c75-0030f8299bca?t=1585757457709</a>                                                                                                                                                                                                                                                                                                                                                                          |
| Italian Society of Anaesthesia Analgesia Resuscitation and Intensive Care | ?          | Italian | <a href="http://www.siaarti.it/SiteAssets/News/COVID19%20-%20documenti%20SIAARTI/SIAARTI%20-%20Covid-19%20-%20Clinical%20Ethics%20Recomendations.pdf">http://www.siaarti.it/SiteAssets/News/COVID19%20-%20documenti%20SIAARTI/SIAARTI%20-%20Covid-19%20-%20Clinical%20Ethics%20Recomendations.pdf</a>                                                                                                                                                                                                                                                                                                                                                                    |
| <b>Germany</b>                                                            |            |         |                                                                                                                                                                                                                                                                                                                                                                                                                                                                                                                                                                                                                                                                          |

|                                                                                                   |            |                   |                                                                                                                                                                                                                                                                                                                                                                                                                                                                                                                                                                                                              |
|---------------------------------------------------------------------------------------------------|------------|-------------------|--------------------------------------------------------------------------------------------------------------------------------------------------------------------------------------------------------------------------------------------------------------------------------------------------------------------------------------------------------------------------------------------------------------------------------------------------------------------------------------------------------------------------------------------------------------------------------------------------------------|
| Ethics Working Group of the Austrian Society for Anaesthesiology Resuscitation and Intensive Care | 17/03/2020 | German            | <a href="https://www.oegari.at/web_files/cms_daten/covid-19_ressourcenallokation_gari-statement_v1.7_final_2020-03-17.pdf">https://www.oegari.at/web_files/cms_daten/covid-19_ressourcenallokation_gari-statement_v1.7_final_2020-03-17.pdf</a>                                                                                                                                                                                                                                                                                                                                                              |
| Austria Bioethics Commission                                                                      | 31/03/2020 | German            | <a href="https://rm.coe.int/management-scarce-resources/16809e40f1">https://rm.coe.int/management-scarce-resources/16809e40f1</a>                                                                                                                                                                                                                                                                                                                                                                                                                                                                            |
| German Interdisciplinary Association for Intensive Care and Emergency Medicine                    | 17/04/2020 | German            | <a href="https://www.awmf.org/uploads/tx_szleitlinien/040-0131_S1_Zuteilung-intensivmedizinischer-Ressourcen-COVID-19-Pandemie-Klinisch-ethische_Empfehlungen_2020-07_2.pdf">https://www.awmf.org/uploads/tx_szleitlinien/040-0131_S1_Zuteilung-intensivmedizinischer-Ressourcen-COVID-19-Pandemie-Klinisch-ethische_Empfehlungen_2020-07_2.pdf</a>                                                                                                                                                                                                                                                          |
| <b>Ireland</b>                                                                                    |            |                   |                                                                                                                                                                                                                                                                                                                                                                                                                                                                                                                                                                                                              |
| Department of Health Ireland                                                                      | 27/03/2020 | English           | <a href="https://www.gov.ie/en/publication/dbf3fb-ethical-framework-for-decision-making-in-a-pandemic/">https://www.gov.ie/en/publication/dbf3fb-ethical-framework-for-decision-making-in-a-pandemic/</a>                                                                                                                                                                                                                                                                                                                                                                                                    |
| <b>European guidelines</b>                                                                        |            |                   |                                                                                                                                                                                                                                                                                                                                                                                                                                                                                                                                                                                                              |
| Council of Europe                                                                                 | N/A        | Various languages | <a href="https://www.coe.int/en/web/bioethics/selected-resources-by-country/">https://www.coe.int/en/web/bioethics/selected-resources-by-country/</a>                                                                                                                                                                                                                                                                                                                                                                                                                                                        |
| European Centre for Disease Prevention and Control                                                | 19/05/2020 | English           | <a href="https://www.ecdc.europa.eu/sites/default/files/documents/covid-19-long-term-care-facilities-surveillance-guidance.pdf">https://www.ecdc.europa.eu/sites/default/files/documents/covid-19-long-term-care-facilities-surveillance-guidance.pdf</a>                                                                                                                                                                                                                                                                                                                                                    |
| European Association of Service providers for Persons with Disabilities                           | 04/2020    | English           | <a href="https://www.easpd.eu/sites/default/files/sites/default/files/Publications2020/impact_of_covid-19_on_disability_services_in_europe_a_first_snapshot.pdf">https://www.easpd.eu/sites/default/files/sites/default/files/Publications2020/impact_of_covid-19_on_disability_services_in_europe_a_first_snapshot.pdf</a>                                                                                                                                                                                                                                                                                  |
| World Health Organisation                                                                         | 23/04/2020 | English           | <a href="https://www.euro.who.int/en/health-topics/health-emergencies/coronavirus-covid-19/statements/statement-invest-in-the-overlooked-and-unsung-build-sustainable-people-centred-long-term-care-in-the-wake-of-covid-19">https://www.euro.who.int/en/health-topics/health-emergencies/coronavirus-covid-19/statements/statement-invest-in-the-overlooked-and-unsung-build-sustainable-people-centred-long-term-care-in-the-wake-of-covid-19</a>                                                                                                                                                          |
| <b>Spain</b>                                                                                      |            |                   |                                                                                                                                                                                                                                                                                                                                                                                                                                                                                                                                                                                                              |
| The Spanish Society of Intensive Critical Medicine and Coronary Units.                            | 14/03/2020 | Spanish           | <a href="https://www.semicuc.org/covid19_files/Plan_de_Contingencia_COVID-19.pdf">https://www.semicuc.org/covid19_files/Plan_de_Contingencia_COVID-19.pdf</a>                                                                                                                                                                                                                                                                                                                                                                                                                                                |
| Spanish Bioethics Committee                                                                       | 23/03/2020 | Spanish           | <a href="http://assets.comitedebioetica.es/files/documentacion/Informe%20CBE-%20Priorizacion%20de%20recursos%20sanitarios-coronavirus%20CBE.pdf">http://assets.comitedebioetica.es/files/documentacion/Informe%20CBE-%20Priorizacion%20de%20recursos%20sanitarios-coronavirus%20CBE.pdf</a>                                                                                                                                                                                                                                                                                                                  |
| Spanish Ministry of Health                                                                        | 03/04/2020 | English           | <a href="https://rm.coe.int/pandemic-covid-19-spain-eng/16809e3a78">https://rm.coe.int/pandemic-covid-19-spain-eng/16809e3a78</a>                                                                                                                                                                                                                                                                                                                                                                                                                                                                            |
| Autism Spain                                                                                      | 05/05/2020 | Spanish           | <a href="http://www.autismo.org.es/actualidad/articulo/autismo-espana-elabora-un-documento-de-propuestas-de-desescalada-para-entidades">http://www.autismo.org.es/actualidad/articulo/autismo-espana-elabora-un-documento-de-propuestas-de-desescalada-para-entidades</a>                                                                                                                                                                                                                                                                                                                                    |
| <b>France</b>                                                                                     |            |                   |                                                                                                                                                                                                                                                                                                                                                                                                                                                                                                                                                                                                              |
| Ministry of Disability                                                                            | 04/05/2020 | French            | <a href="https://handicap.gouv.fr/IMG/pdf/04052020_-_les_grandes_lignes_du_plan_de_deconfinement_pour_les_personnes_en_situation_de_handicap_vd.pdf">https://handicap.gouv.fr/IMG/pdf/04052020_-_les_grandes_lignes_du_plan_de_deconfinement_pour_les_personnes_en_situation_de_handicap_vd.pdf</a><br><a href="https://handicap.gouv.fr/autisme-et-troubles-du-neuro-developpement/infos-speciales-coronavirus/article/information-covid-19-et-confinement">https://handicap.gouv.fr/autisme-et-troubles-du-neuro-developpement/infos-speciales-coronavirus/article/information-covid-19-et-confinement</a> |
| President of the Republic                                                                         | 02/04/2020 | French            | <a href="https://www.elysee.fr/emmanuel-macron/2020/04/02/autisme">https://www.elysee.fr/emmanuel-macron/2020/04/02/autisme</a><br><a href="https://www.gouvernement.fr/sites/default/files/contentu/piece-jointe/2020/03/attestation-deplacement-falc.pdf">https://www.gouvernement.fr/sites/default/files/contentu/piece-jointe/2020/03/attestation-deplacement-falc.pdf</a>                                                                                                                                                                                                                               |

|                                                                 |            |            |                                                                                                                                                                                                                                                                                                   |
|-----------------------------------------------------------------|------------|------------|---------------------------------------------------------------------------------------------------------------------------------------------------------------------------------------------------------------------------------------------------------------------------------------------------|
|                                                                 | 17/03/2020 |            |                                                                                                                                                                                                                                                                                                   |
| <b>Poland</b>                                                   |            |            |                                                                                                                                                                                                                                                                                                   |
| Organisation for the Help of Autistic People                    | 06/04/2020 | Polish     | <a href="https://www.gdansk.pl/wiadomosci/sytuacja-osob-z-autyzmem-w-dobie-koronawirusa-rozmowa-z-malgorzata-rybicka,a,168209">https://www.gdansk.pl/wiadomosci/sytuacja-osob-z-autyzmem-w-dobie-koronawirusa-rozmowa-z-malgorzata-rybicka,a,168209</a>                                           |
| National Fund for the Rehabilitation of Disabled People (PFRON) | 02/03/2020 | Polish     | <a href="https://www.pfron.org.pl/aktualnosci/szczegoly-aktualnosci/news/pomoc-pfron-dla-osob-niepelnosprawnych-w-zwiazku-z-epidemia-koronawirusa/">https://www.pfron.org.pl/aktualnosci/szczegoly-aktualnosci/news/pomoc-pfron-dla-osob-niepelnosprawnych-w-zwiazku-z-epidemia-koronawirusa/</a> |
| <b>Portugal</b>                                                 |            |            |                                                                                                                                                                                                                                                                                                   |
| The Portuguese Ministry of Health                               | 18/04/2020 | Portuguese | <a href="https://www.dgs.pt/directrizes-da-dgs/normas-e-circulares-normativas/norma-n-0112020-de-18042020-pdf.aspx">https://www.dgs.pt/directrizes-da-dgs/normas-e-circulares-normativas/norma-n-0112020-de-18042020-pdf.aspx</a>                                                                 |

**Supplementary Table 3***Autism-Europe survey items included in this review.*

| <b>Autism-Europe survey items</b>                                                                                                      |
|----------------------------------------------------------------------------------------------------------------------------------------|
| Are you considered to be within the group at higher risk for COVID-19?                                                                 |
| Were you tested for COVID-19?                                                                                                          |
| <i>If yes:</i> Did you receive adequate/ accessible information about getting tested for COVID-19?                                     |
| <i>If yes:</i> Were any reasonable adjustments provided for autism needs during testing for COVID-19?                                  |
| Did you have to get treated in relation to COVID-19?                                                                                   |
| <i>If yes:</i> Did you experience difficulty to contact healthcare professionals/ first aid responders during the COVID-19 spread?     |
| <i>If yes:</i> Was it due to the inaccessibility of the process e.g. contact to be made by phone?                                      |
| Do you need support for daily activities?                                                                                              |
| Have your usual support services been interrupted since the beginning of the COVID-19 spread?                                          |
| Are your support person(s) considered at higher risk for COVID-19?                                                                     |
| If your support person(s) get(s) infected, do you have another support person?                                                         |
| Is there accessible information available for autistic people on the COVID-19 spread and the current measures in place where you live? |
| If you would like to make any comment, use the field below – optional.                                                                 |
